# Supplementary material
Source: HighWire-hosted journal article supplement (https://cmaj.ca/highwire/filestream/59596/field_highwire_adjunct_files/5/150771-res-Appendix_4.pdf)
Supplement: 150771-res-Appendix_4.pdf [file 150771-res-Appendix_4.pdf]

**Appendix 4 (as supplied by the authors):** Cumulative incidence of adverse outcomes (hospital admission with acute kidney injury or hyperkalemia) among ACEI and ARB users with diabetic retinopathy.

**(A) Hospital admission with acute kidney injury**

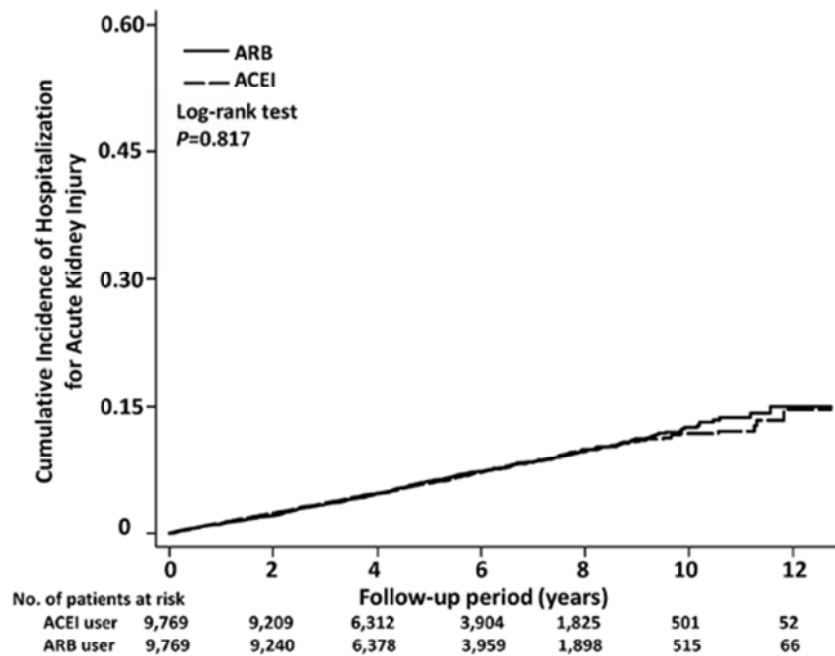

**(B) Hospital admission with hyperkalemia**

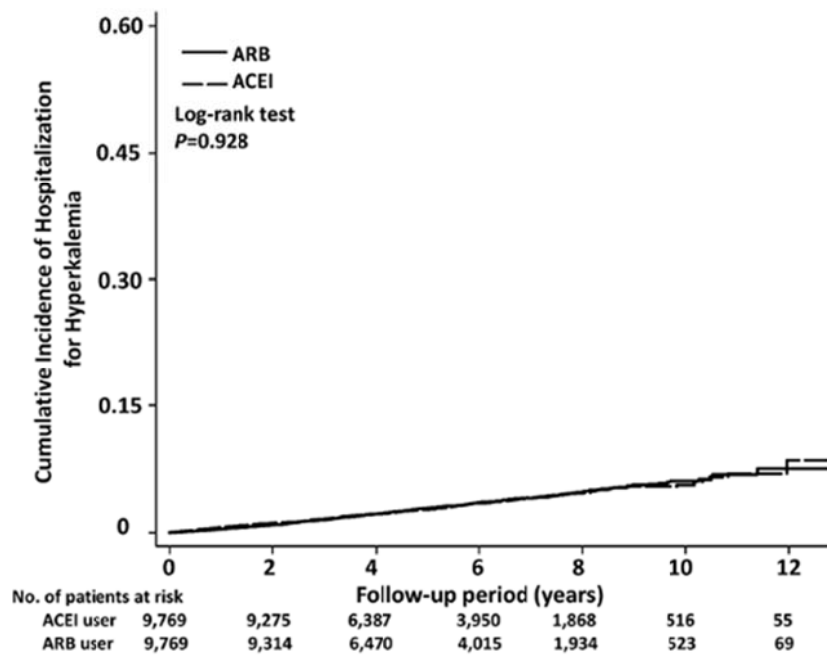

Appendix to: Shih CJ, Chen HT, Kuo SC, et al. Comparative effectiveness of angiotensin-converting-enzyme inhibitors and angiotensin II receptor blockers in patients with type 2 diabetes and retinopathy. *CMAJ* 2016. DOI:10.1503/cmaj.150771.

Copyright © 2016 The Author(s) or their employer(s).  
To receive this resource in an accessible format, please contact us at [cmajgroup@cmaj.ca](mailto:cmajgroup@cmaj.ca).
